# Supplementary material for: Efficacy and pharmacokinetics of ozoralizumab, an anti-TNFα NANOBODY® compound, in patients with rheumatoid arthritis: 52-week results from the OHZORA and NATSUZORA trials
Source: PubMed Central journal article supplement (PMC10099673; doi:10.1186/s13075-023-03036-4), 2023-04-13

**Supplementary Fig. S1.** Comparison of plasma ozoralizumab concentrations in patients with seropositive and seronegative RA.

Plasma concentration–time profiles from the first dose to 4 weeks (A, B) and trough concentrations throughout 52 weeks (C, D) with methotrexate are shown. Seropositive RA indicates an anti–cyclic citrullinated peptide antibody level  $\geq 4.5$  U/mL and/or rheumatoid factor level  $> 15$  IU/mL. RA rheumatoid arthritis, SD standard deviation.

**OHZORA trial**

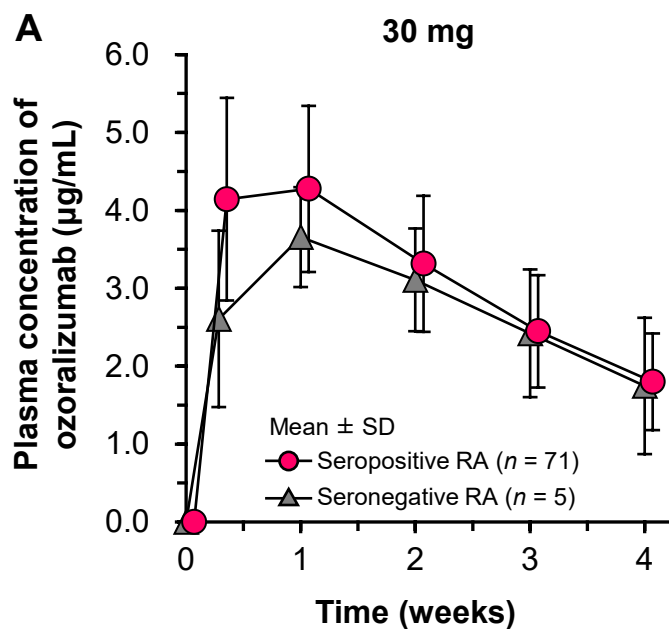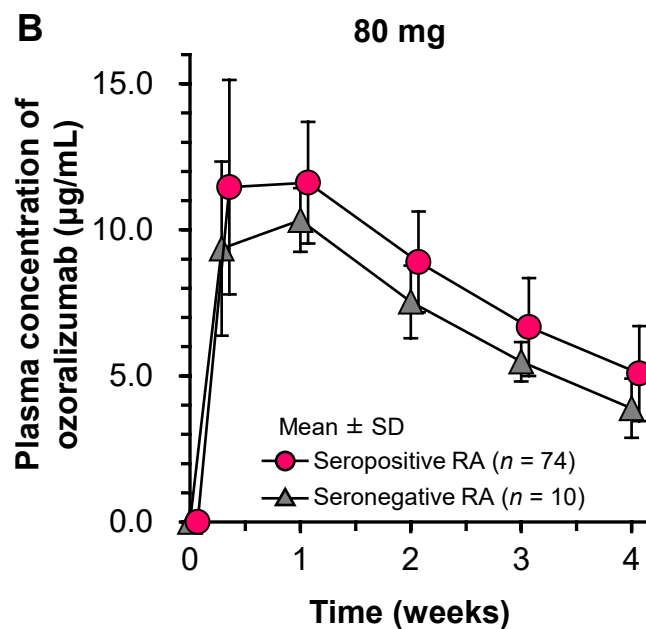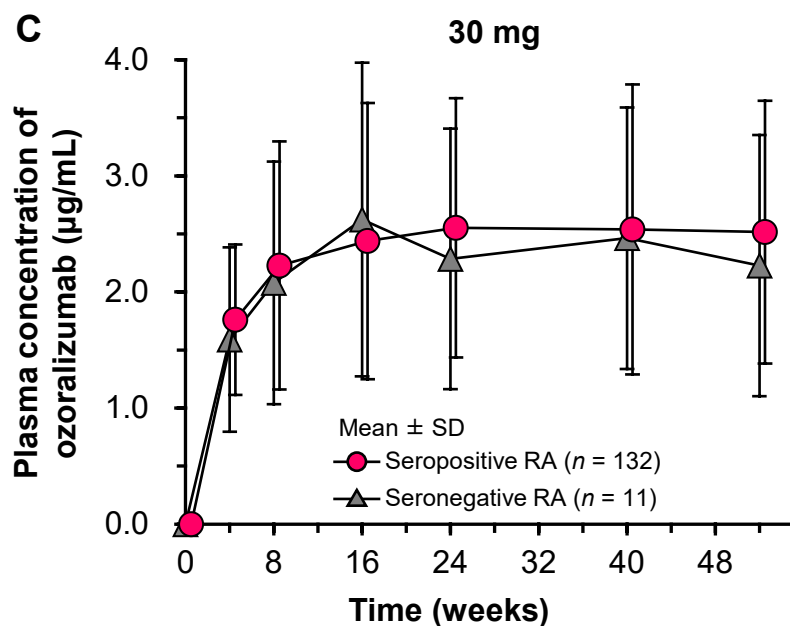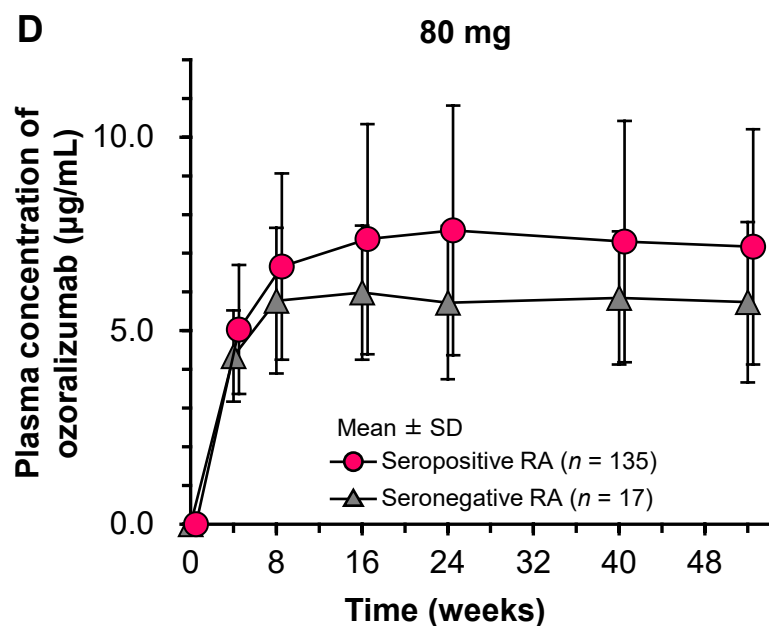

Supplement: 13075_2023_3036_MOESM2_ESM.pdf [file 13075_2023_3036_MOESM2_ESM.pdf]
